# Supplementary material
Source: Frontiers journal article supplement (https://www.frontiersin.org/articles/470316)
Supplement: Data_Sheet_1.PDF [file Data_Sheet_1.PDF]

Supplementary Figure S1.

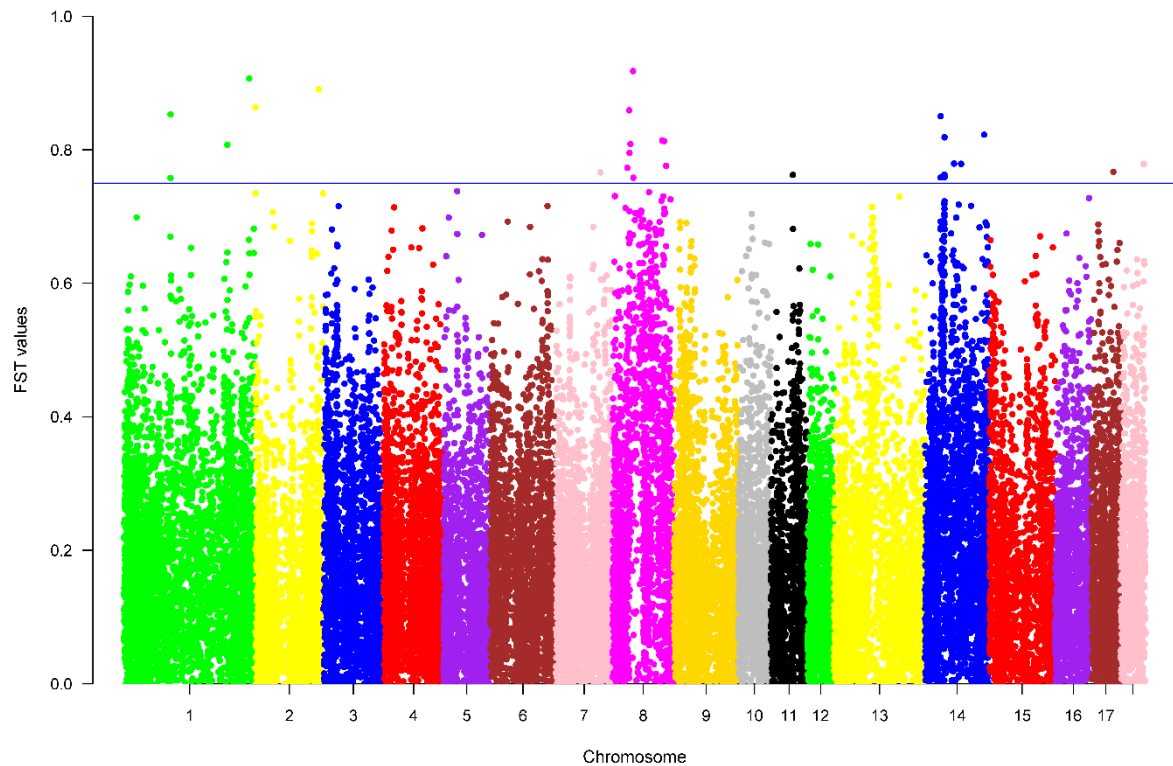

Genome-wide analysis of global  $F_{ST}$  between Black Slavonian pig and modern pig breeds (Landrace and Pietrain). Manhattan plot of genome-wide  $F_{ST}$  values between the Black Slavonian pigs and modern pig breeds.  $F_{ST}$  values are shown on the y axis, and genomic locations on the x axis. The different chromosomes are shown in color range.

Supplementary Figure S2.

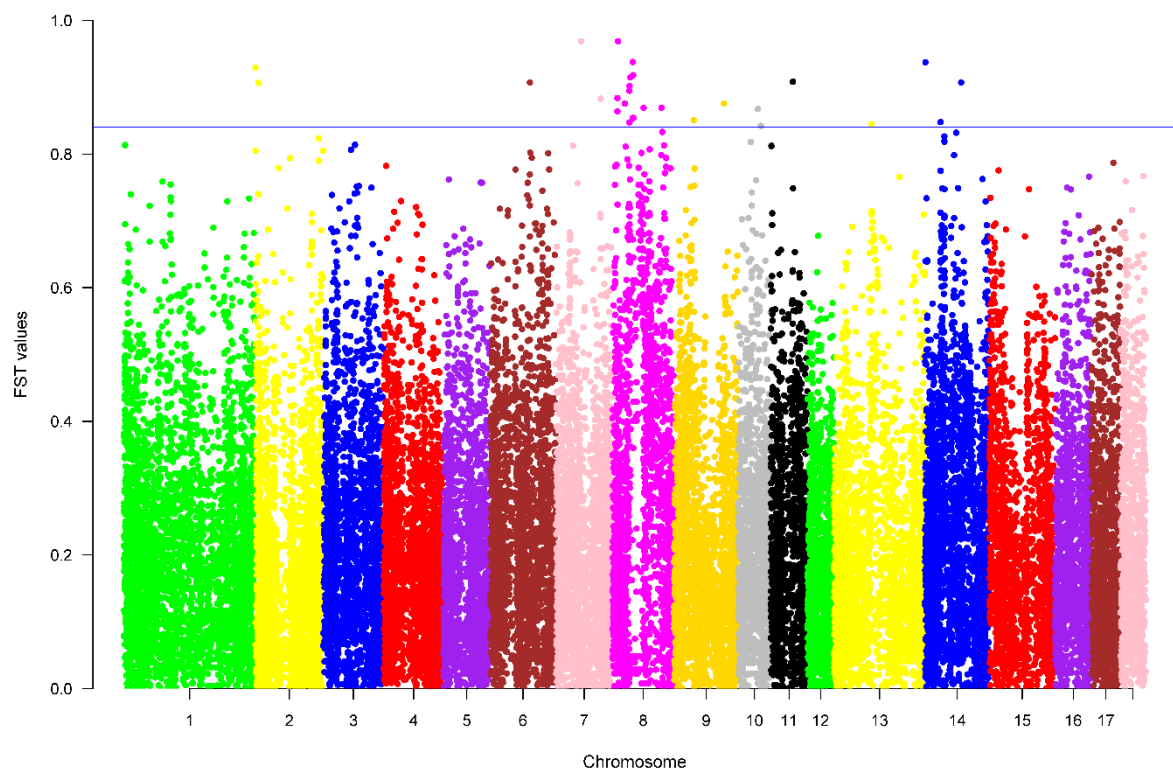

Genome-wide analysis of global  $F_{ST}$  between Turopolje pig and modern pig breeds (Landrace and Pietrain). Manhattan plot of genome-wide  $F_{ST}$  values between Turopolje pig and modern pig breeds.  $F_{ST}$  values are shown on the y axis, and genomic locations on the x axis. The different chromosomes are shown in color range.

Supplementary Figure S3.

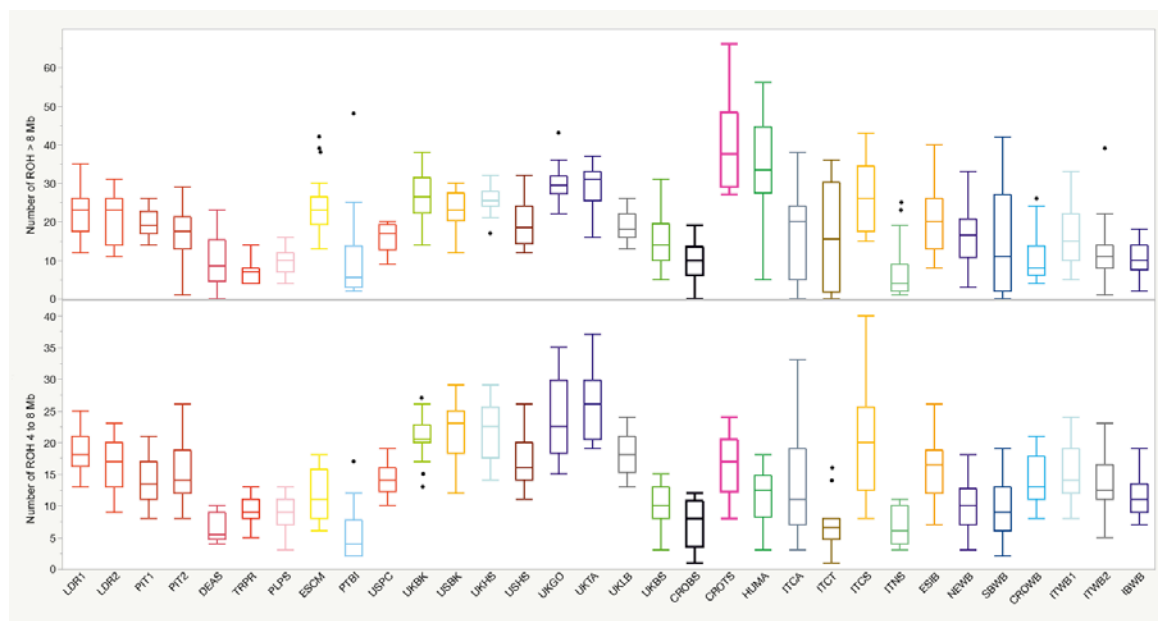

The distribution of the ROH inbreeding coefficients ( $F_{\text{ROH}}$  4 to 8 Mb;  $F_{\text{ROH}} > 8$  Mb) for the analyzed pig populations.

Supplementary Figure S4.

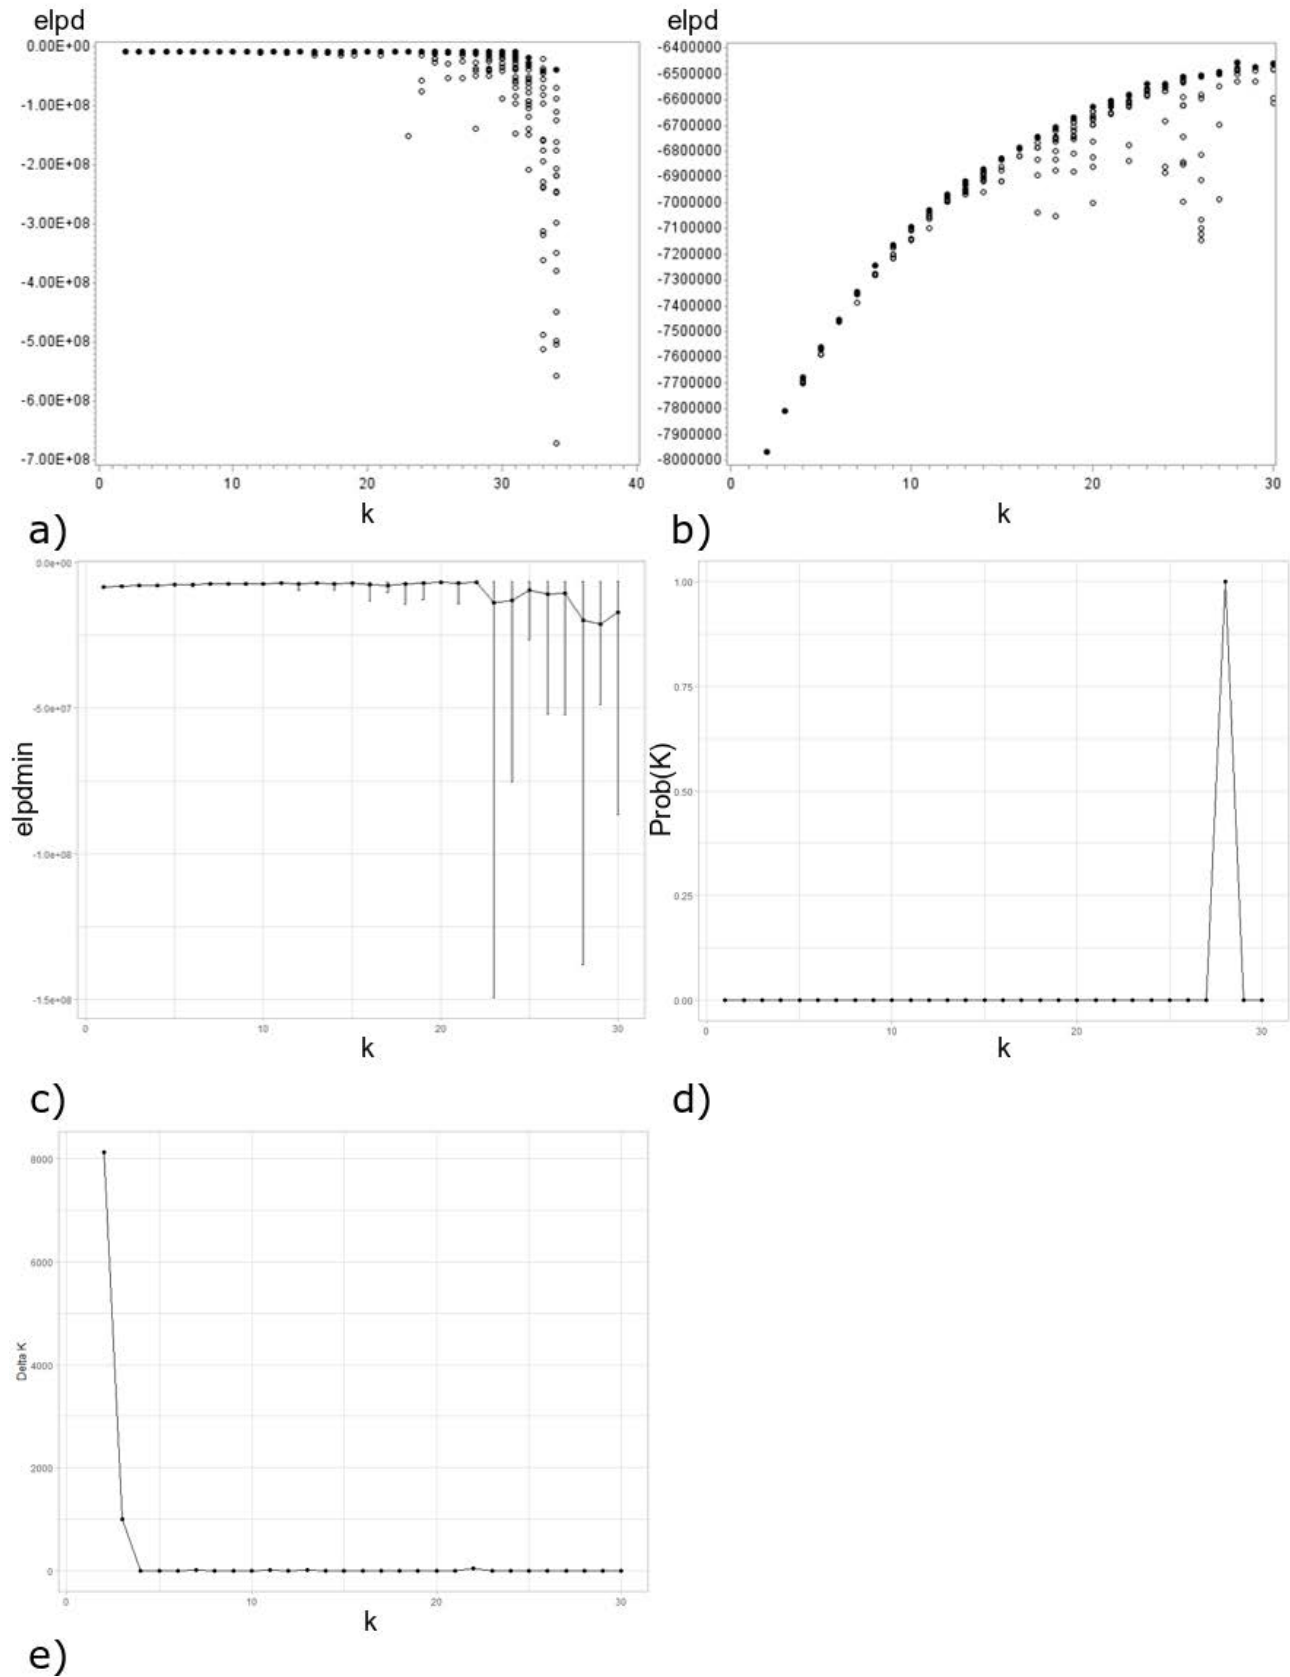

**Figure S4** Plots representing the results of the 20 runs per model in the structure population analysis used to determine the most likely number of clusters (K) of the analysed pig populations.

- a)** K plot showing the estimated ln probability of data (elpd) for each k (k=1 to 34) and each run.
- b)** K plot showing the estimated ln probability of data for each k used in the further analysis (k=2 to 30) and selected runs where the smallest elpd difference from the other elpd values included in the plot, for the specific k, is less than -200 000 where k=16 to 30, and less than -100 000 where k=1 to 15.
- c)** Mean likelihood ( $\pm$ SD) over the 20 runs for each k value tested (k=1 to 30), obtained by pophelper (Francis, 2017).
- d)** Probability by K plot using median values of Ln(Pr Data) the k for which Pr(K=k) is highest over the 20 runs for each k value tested (k=1 to 30), obtained by CLUMPAK (Kopelman et al., 2015).
- e)** Delta K curve (Delta K =  $\text{mean}(|L''(K)|) / \text{stdev}[L(K)]$ ) estimated according to Evanno et al. (2005), over the 20 runs for each k value tested (k=1 to 30), obtained by CLUMPAK (Kopelman et al., 2015).

## Other K plots

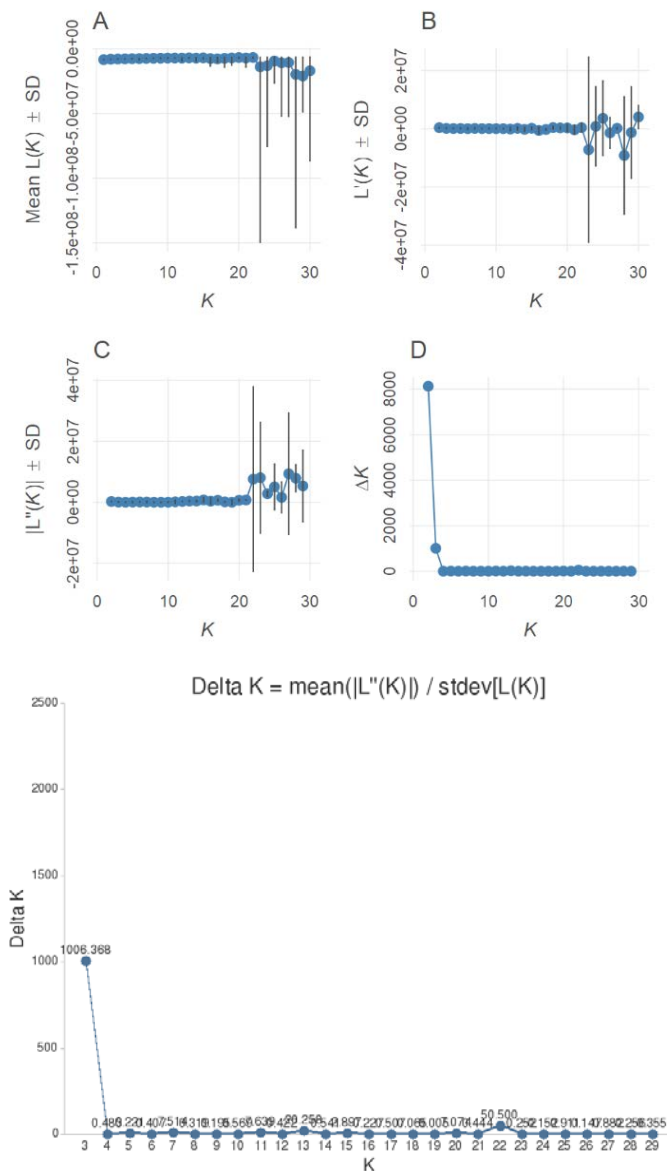

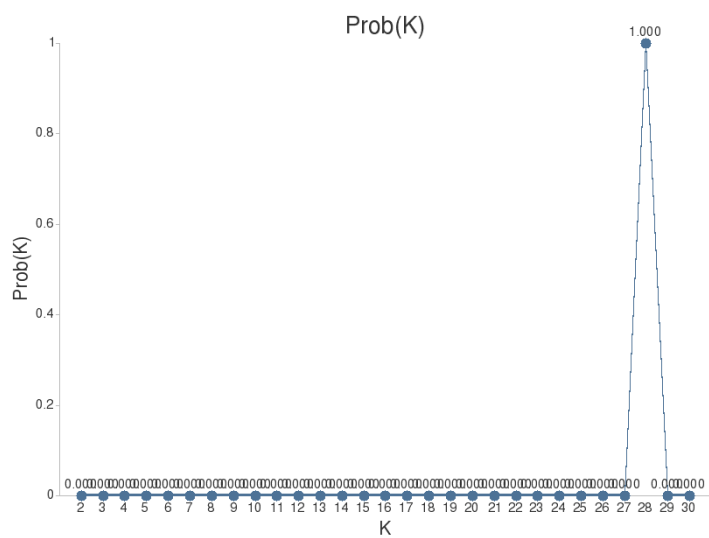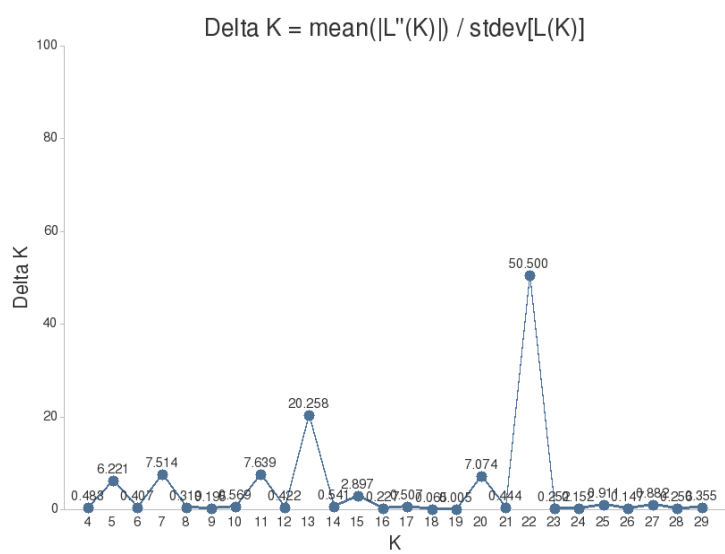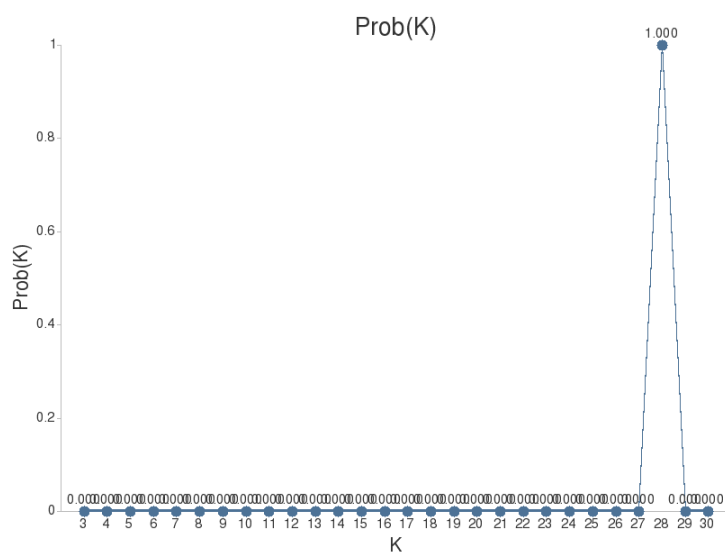

## Structure analysis parameters

Analyses of the  $\ln \Pr(G|K)$  for the 20 runs performed for each K-value (1 to 34) showed high convergence for K values up to K = 24 and increasing variability, with decreasing values of  $\ln \Pr(G|K)$  for higher K values. The analyses of the populations over 20 runs per each of the 34 models showed a high range of  $\ln \Pr(G|K)$  and decreasing values from K = 34 (Supplementary Figure S4a). A closer inspection of the K plot showed that the estimated  $\ln \Pr(G|K)$  for each K used for further analysis (K = 1 to 30) increased if the runs were selected in the difference between the smallest and other  $\ln \Pr(G|K)$  values included in the plot. Values of  $\ln \Pr(G|K)$  were lower than -200,000 for K = 16 to 30, and lower than -100,000 for K = 1 to 15 (Supplementary Figure S4b). Furthermore, mean likelihoods ( $\pm$ standard deviation, SD) over the 20 runs for each K value showed the biggest decrease when K = 23, with a similar pattern for consecutive K values (Supplementary Figure S4c). The most appropriate number of clusters for 32 populations according to  $\Delta K$  (8,125) was two (Supplementary Figure S4e). The secondary peak of  $\Delta K$  (1,006) was obtained for K = 3. Consecutive  $\Delta K$  values with lower but observable magnitudes were K = 22 (50.5) and K = 13 (20.58). The K graph (see Supplementary Figure S4d) revealed that the model with K = 28 was the best, with  $\Pr(K) = 1$ .

Figure 2 shows the results of models with K = 3, 13, 18, or 28 to determine the population structure and admixture of Black Slavonian and Turopolje pigs with respect to other domestic breeds and wild boar populations. All 20 runs of models K = 3 and K = 18 were consistent and grouped together, with respective average  $\ln \Pr(G|K)$  values of -7,808,713 and -7,305,082. The runs of models after K = 4 showed different clustering outcomes, with an additional 1-3 minor modes. The model K = 13 showed a major mode of 10 runs, with an average  $\ln \Pr(G|K)$  equal to -6,939,055, and two minor modes. The first minor mode consisted of seven runs with average  $\ln \Pr(G|K)$  equal to -6,928,876, and the second minor mode consisted of three runs with average  $\ln \Pr(G|K)$  equal to -6,921,163. Model K = 28 showed a major mode consisting of 11 runs with the average  $\ln \Pr(G|K)$  equal to -17,649,905, and two minor modes. The first minor mode consisted of four runs with average  $\ln \Pr(G|K)$  equal to -40,880,514, and the second minor mode consisted of five runs with average  $\ln \Pr(G|K)$  equal to -7,347,507.
